# Supplementary material for: Performance of women with fibromyalgia in walking up stairs while carrying a load
Source: PeerJ. 2016 Feb 1;4:e1656. doi: 10.7717/peerj.1656 (PMC4741081; doi:10.7717/peerj.1656)
Supplement: Dataset S1 [file peerj-04-1656-s001.xlsx]

## Sheet: Base de datos PeerJ
ID	Group	Height	Weight	FreeFatMass	MuscularMass	FatMass	BMI	Age	YearsSymptoms	YearsDiagn	FIQR_D1	FIQR_D2	FIQR_D3	FIQR_TOTAL	FIQ__TOTAL	FIQ_Pain	MeanTiltCarryingLoad	MedianTiltCarryingLoad	MeanTiltWithoutLoad	MedianTiltWithoutLoad	LoadEffectStair1	LoadEffectStair2	LoadEffectStair3	LoadEffectStair4	LoadEffectStair5	LoadEffectStair6	LoadEffectStair7	LoadEffectStair8	CarryingLoadTimeStair1	CarryingLoadTimeStair2	CarryingLoadTimeStair3	CarryingLoadTimeStair4	CarryingLoadTimeStair5	CarryingLoadTimeStair6	CarryingLoadTimeStair7	CarryingLoadTimeStair8	WithoutLoadTimeStair1	WithoutLoadTimeStair2	WithoutLoadTimeStair3	WithoutLoadTimeStair4	WithoutLoadTimeStair5	WithoutLoadTimeStair6	WithoutLoadTimeStair7	WithoutLoadTimeStair8	LoadEffectInitial	LoadEffectIntermed	LoadEffectFinal	OverallLoadEffect
1	0	155	63.3	62.7	59.6	37.3	26.3	47									2.62666	2.01875	2.84725	2.775	28.0702	5.35714	5.08475	1.63934	-3.0303	1.47059	11.4754	20.6349	73	59	62	62	64	69	68	76	57	56	59	61	66	68	61	63	12.8374	-0.695479	11.1936	8.83775
2	0	166	61.8	69.3	65.5	30.7	22.4	43									1.4536	1.4875	2.56433	2.0375	15.9091	7.5	-6.12245	17.0732	13.6364	8	29.2683	11.7647	51	43	46	48	50	54	53	57	44	40	49	41	44	50	41	51	5.76221	15.3548	16.3443	12.1286
3	0	162	72.3	60	57.1	40	27.5	39									2.31118	1.93125	1.54147	1.13125	13.5593	11.7647	-7.69231	-14.8649	-5.55556	11.5942	17.5676	11.1111	67	76	72	63	68	77	87	80	59	68	78	74	72	69	74	72	5.87724	-10.2102	13.4243	4.68552
4	0	155	63.6	60.2	57.1	39.8	26.5	73									1.61563	1.35	3.30418	3.43125	4.6875	-1.49254	20.6349	15.2778	13.2353	13.6364	1.38889	10.7692	67	66	76	83	77	75	73	72	64	67	63	72	68	66	72	65	7.94329	14.2565	8.59816	9.76718
5	0	155	74.1	57.2	54.5	42.8	30.8	68									1.66284	1.45	1.64688	1.45	8.69565	3.77358	18.8679	7.01754	7.01754	7.14286	9.09091	8.77193	50	55	63	61	61	60	60	62	46	53	53	57	57	56	55	57	10.4457	7.01754	8.33523	8.79724
6	0	156	70.9	62.5	59.2	37.5	29.1	71									1.27459	1.425	1.45041	1.6875	13.5135	2.63158	2.7027	-12.5	-7.69231	2.7027	-2.5641	5.40541	42	39	38	35	36	38	38	39	37	38	37	40	39	37	39	37	6.2826	-10.0962	1.848	0.524937
7	0	155	69.9	59.2	56.2	40.8	29.1	68									1.12734	0.4625	0.973064	0	-6.25	-13.7931	3.33333	-6.89655	-6.66667	-6.25	0	3.44828	30	25	31	27	28	30	30	30	32	29	30	29	30	32	30	29	-5.56992	-6.78161	-0.933908	-4.13434
8	0	158	84.5	54.7	52	45.3	33.8	63									1.49637	1.28125	2.04205	1.9125	-3.33333	-12.1212	-8.82353	-11.1111	-8.57143	-2.94118	-5.55556	3.0303	29	29	31	32	32	33	34	34	30	33	34	36	35	34	36	33	-8.09269	-9.84127	-1.82214	-6.17838
9	1	160	74	60.7	57.7	39.3	28.9	58	18	12	8.66667	7	20.5	36.1667	47.01	6	2.0874	1.925	1.82796	1.6375	29.5455	47.619	40	23.913	28.2609	25.5319	25	48.8889	57	62	63	57	59	59	55	67	44	42	45	46	46	47	44	45	39.0548	26.087	33.1403	33.5949
10	1	153	84.8	52.8	50.5	47.2	36.2	54	11	9	3.66667	6	27.5	37.1667	43.053	3	2.34657	2.23125	2.56858	2.03125	14.2857	18.4211	13.9535	34.1463	33.3333	25	37.5	36.5854	48	45	49	55	56	55	55	56	42	38	43	41	42	44	40	41	15.5534	33.7398	33.0285	26.6532
11	1	156	63.5	66.1	62.7	33.9	26.1	41	10	8	12.6667	0	18	30.6667	34.999	2	2.31406	2.45	2.00452	1.69375	-6.66667	44.8276	9.09091	46.875	48.5714	61.5385	41.6667	27.7778	42	42	36	47	52	63	51	46	45	29	33	32	35	39	36	36	15.7506	47.7232	43.661	34.2101
12	1	153	68	59.6	56.5	40.4	29	69	6	6	15.3333	5	37	57.3333	48.342	6	1.97381	1.3875	2.46094	2.45	-14.0845	-11.1111	-4.61538	-8.06452	-3.0303	3.8961	1.40845	20.5479	61	56	62	57	64	80	72	88	71	63	65	62	66	77	71	73	-9.937	-5.54741	8.6175	-1.88167
13	1	153	84.1	52.6	49.9	47.4	35.9	60	11	5	21.6667	5	44	70.6667	58.675	8	1.56284	1.54375	1.34769	1.29375	3.77358	14.5833	20.8333	18	15.6863	15.6863	15.0943	20.3704	55	55	58	59	59	59	61	65	53	48	48	50	51	51	53	54	13.0634	16.8431	17.0503	15.5034
14	1	157	86	57.8	54.8	42.2	34.89	60	29	11	14.6667	0	29.5	44.1667	58.01	8	3.175	3.53125	2.42306	2.35625	-2.22222	2.32558	0	7.14286	7.14286	9.7561	14.6341	17.9487	44	44	40	45	45	45	47	46	45	43	40	42	42	41	41	39	0.0344531	7.14286	14.113	7.091
15	1	158	66.9	64.4	61.1	35.6	26.8	73	21	13	20.3333	5	29.5	54.8333	69.052	7	2.8784	2.36875	2.83631	2.45625	52.7778	6.66667	6.52174	19.5652	19.5652	10.6383	8.16327	15.5556	55	48	49	55	55	52	53	52	36	45	46	46	46	47	49	45	21.9887	19.5652	11.4524	17.4317
16	1	156	70.7	58	55.2	42	29.1	62	16	11	4.33333	12	27.5	43.8333	36.674	0	1.78757	1.59375	2.12673	1.99375	63.2653	23.4043	21.8182	33.3333	21.1538	11.1111	26.5306	15.2542	80	58	67	68	63	60	62	68	49	47	55	51	52	54	49	59	36.1626	27.2436	17.632	26.9839
17	1	158	61.4	66.6	63.4	33.4	24.6	49	29	8	5.66667	2	21	28.6667	33.01	0	3.45557	3.9	1.75781	1.825	20.4082	34.6939	5.66038	20.4082	14.2857	8.33333	5.66038	15.0943	59	66	56	59	56	52	56	61	49	49	53	49	49	48	53	53	20.2541	17.3469	9.69602	15.568
18	1	163	58.6	66.2	62.8	33.8	22.1	46	6	5	18.3333	6	31.5	55.8333	58.814	7	1.88804	1.9625	2.73543	2.48125	8.33333	-2.17391	0	-20.339	-13.2075	9.7561	2.08333	14.5833	52	45	43	47	46	45	49	55	48	46	43	59	53	41	48	48	2.05314	-16.7733	8.80759	-0.120543
19	1	155	67	59.3	56.1	40.7	27.9	66	11	8	16.6667	14	39	69.6667	59.341	6	1.5319	1.65	0.984681	0.775	0	22.449	55.7692	53.0612	40	23.0769	34.9206	12.1622	62	60	81	75	77	80	85	83	62	49	52	49	55	65	63	74	26.0727	46.5306	23.3866	30.1799
20	1	158	70.7	59.4	56.4	40.6	28.3	49	41	9	18.6667	8	38.5	65.1667	58.343	8	2.71916	2.1	2.8859	2.79375	-14	-6.66667	-8.16327	-2.08333	2.04082	0	2.17391	6.12245	43	42	45	47	50	50	47	52	50	45	49	48	49	50	46	49	-9.60998	-0.0212585	2.76545	-2.57201
